# Supplementary material for: Preliminary Characterization of a Leptin Receptor Knockout Rat Created by CRISPR/Cas9 System
Source: PubMed Central journal article supplement (PMC4633582; doi:10.1038/srep15942), 2015-11-05
Supplement: srep15942-s1.pdf [file srep15942-s1.pdf]

**Preliminary Characterization of a Leptin Receptor Knockout Rat Created by  
CRISPR/Cas9 System**

Dan Bao <sup>a</sup>, Yuanwu Ma <sup>a</sup>, Xu Zhang <sup>a</sup>, Feifei Guan <sup>a</sup>, Wei Chen <sup>a</sup>, Kai Gao <sup>a</sup>, Chuan  
Qin <sup>b,\*</sup>, Lianfeng Zhang <sup>a,\*</sup>

<sup>a</sup> Key Laboratory of Human Disease Comparative Medicine, Ministry of Health,  
Institute of Laboratory Animal Science, Chinese Academy of Medical Sciences &  
Comparative Medical Center, Peking Union Medical College, China.

<sup>b</sup> Key Laboratory of Human Disease Animal Model, State Administration of Traditional  
Chinese Medicine, Institute of Laboratory Animal Science, Chinese Academy of  
Medical Sciences & Comparative Medical Center, Peking Union Medical College,  
China.

\* Corresponding author:

Lianfeng Zhang, Ph.D.

Chuan Qin, Ph.D.

Building 5, Panjiayuan Nanli, Chaoyang District, Beijing 100021 China.

*E-mail:* Zhanglf@cnilas.org; Phone: 86-010-87778442; Fax: 86-010-67776394.

Supplementary Figures

Figure S1

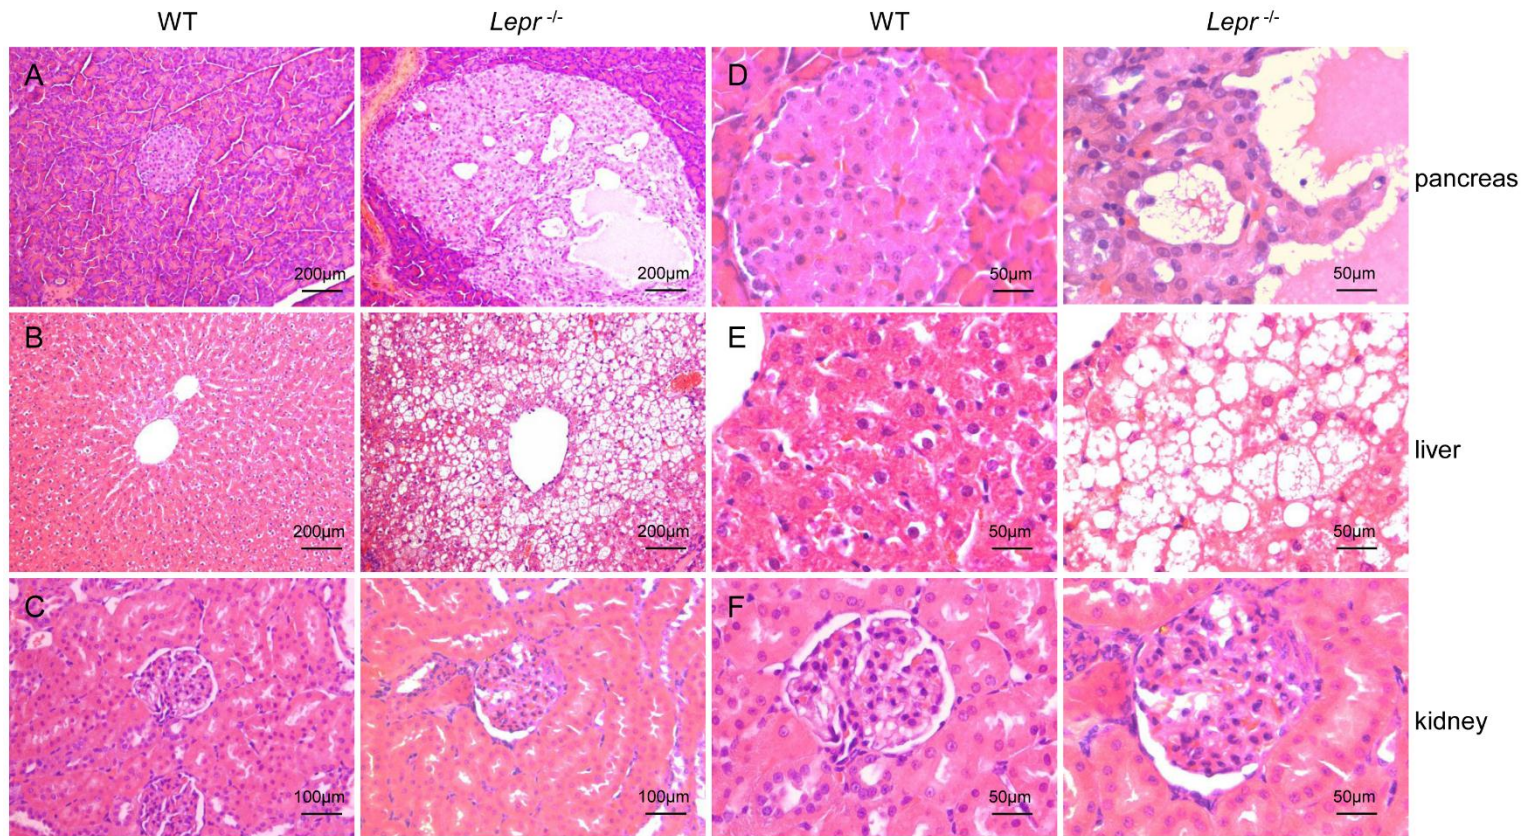

Supplementary Figure S1. Pathological changes of pancreas, liver and kidney in leptin receptor knockout rat at 2 months of age. (A-B) Haematoxylin and eosin (H&E) staining of the pancreas and liver in WT littermates and the *Lepr*<sup>-/-</sup> rats (magnification  $\times 100$ ); (C) H&E staining of the kidney in WT littermates and the *Lepr*<sup>-/-</sup> rats (magnification  $\times 200$ ); (D-F) H&E staining of the pancreas, liver and kidney in WT littermates and the *Lepr*<sup>-/-</sup> rats (magnification  $\times 400$ ).

Figure S2

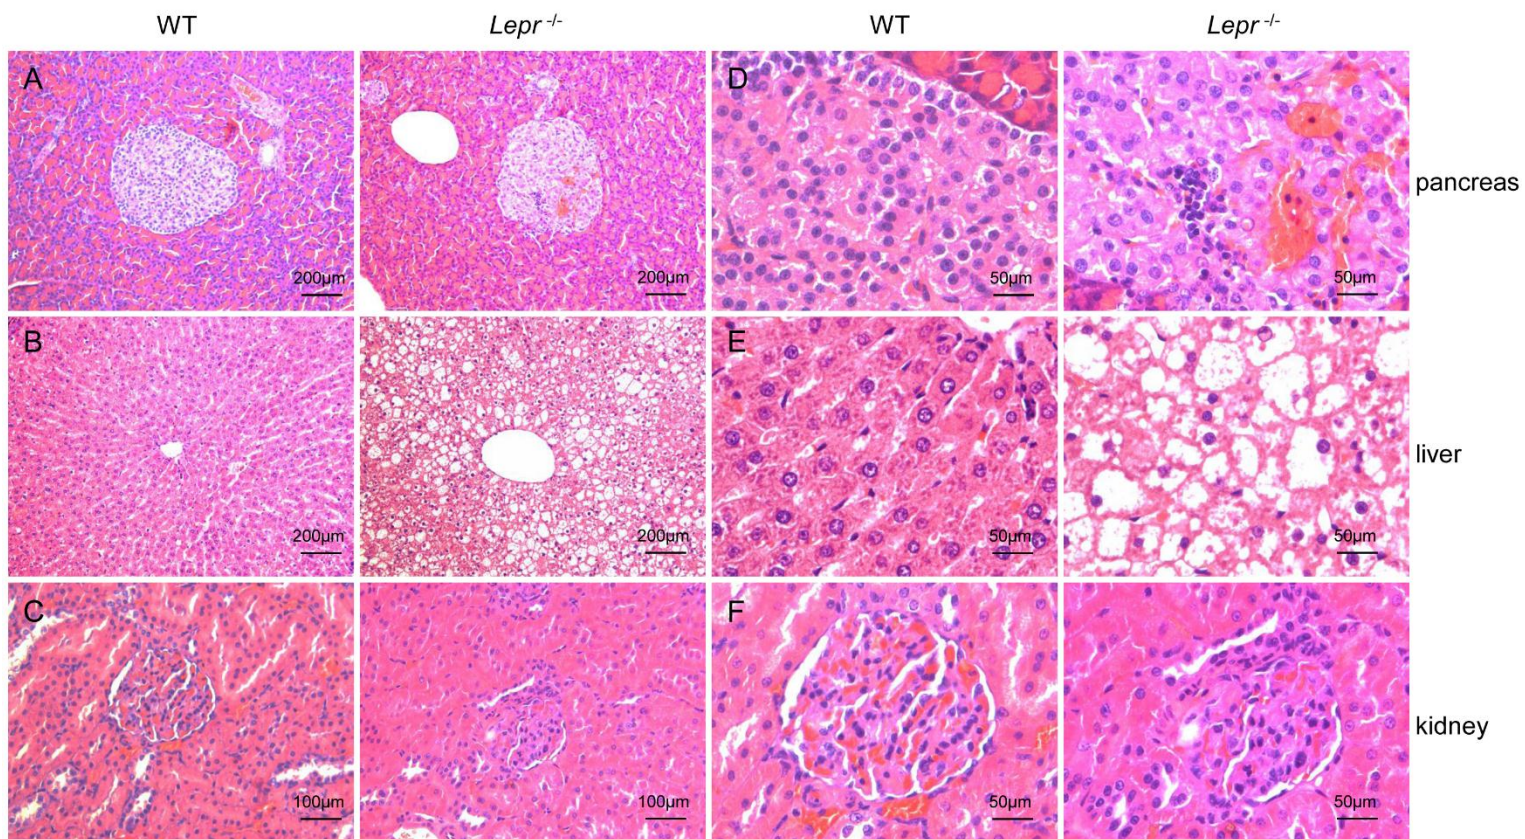

Supplementary Figure S2. Pathological changes of pancreas, liver and kidney in leptin receptor knockout rat at 4 months of age. (A-B) Haematoxylin and eosin (H&E) staining of the pancreas and liver in WT littermates and the *Lepr*<sup>-/-</sup> rats (magnification  $\times 100$ ); (C) H&E staining of the kidney in WT littermates and the *Lepr*<sup>-/-</sup> rats (magnification  $\times 200$ ); (D-F) H&E staining of the pancreas, liver and kidney in WT littermates and the *Lepr*<sup>-/-</sup> rats (magnification  $\times 400$ ).

Figure S3

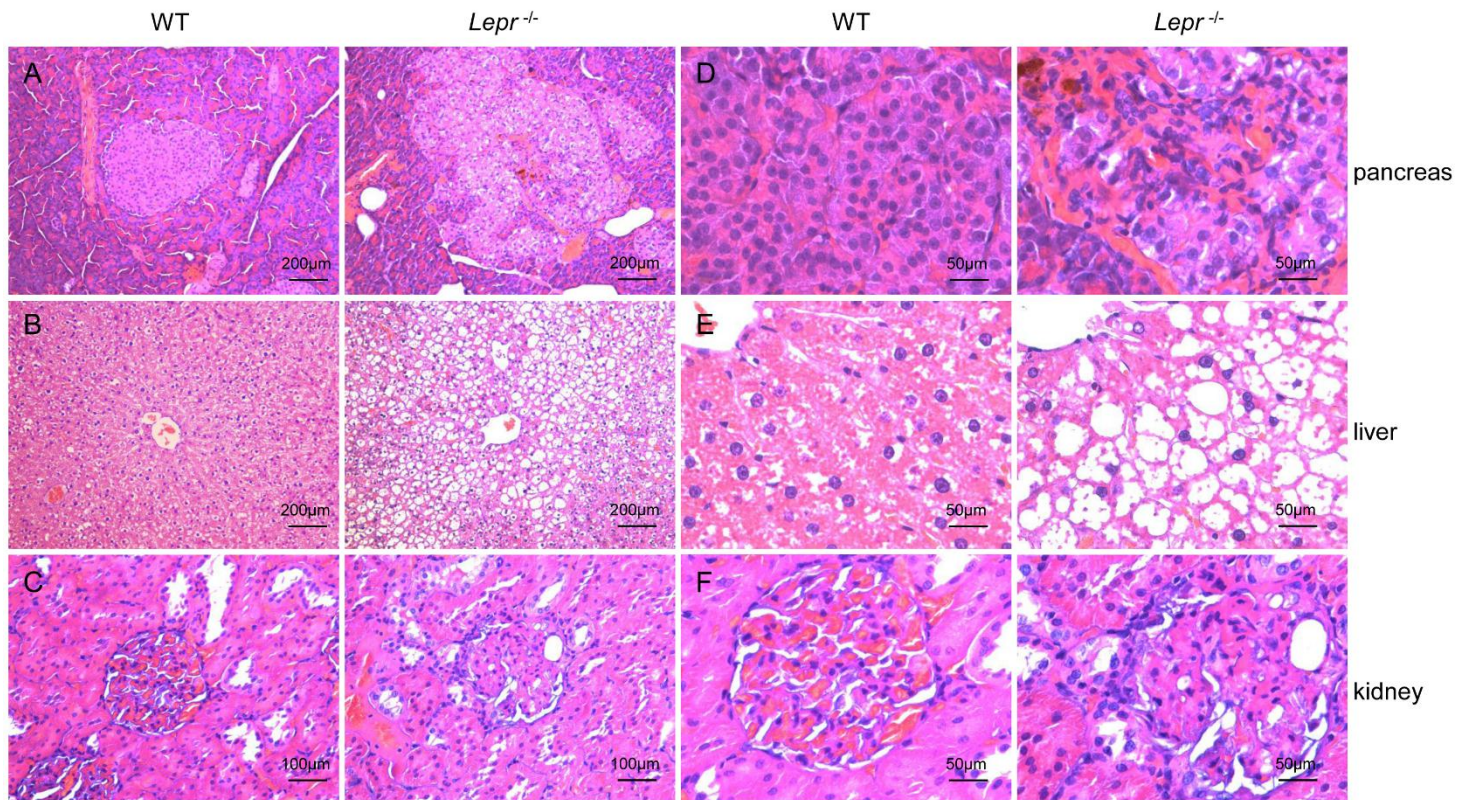

Supplementary Figure S3. Pathological changes of pancreas, liver and kidney in leptin receptor knockout rat at 8 months of age. (A-B) Haematoxylin and eosin (H&E) staining of the pancreas and liver in WT littermates and the *Lepr*<sup>-/-</sup> rats (magnification  $\times 100$ ); (C) H&E staining of the kidney in WT littermates and the *Lepr*<sup>-/-</sup> rats (magnification  $\times 200$ ); (D-F) H&E staining of the pancreas, liver and kidney in WT littermates and the *Lepr*<sup>-/-</sup> rats (magnification  $\times 400$ ).
